# Supplementary material for: Copper oxide activation of soft-templated mesoporous carbons and their electrochemical properties for capacitors
Source: Royal Society of Chemistry journal article supplement (doi:10.1039/c1jm14349b), 2011-11-28
Supplement: c1jm14349b.pdf [file c1jm14349b.pdf]

## Supplementary Information

### Copper oxide activation of soft-templated mesoporous carbons and their electrochemical properties for capacitors

Chunfeng Xue, Yingying Lv, Fan Zhang,\* Limin Wu and Dongyuan Zhao

Department of Chemistry, and Laboratory of Advanced Materials, Fudan University, Shanghai 200433, P. R. China

E-mail: zhang\_fan@fudan.edu.cn

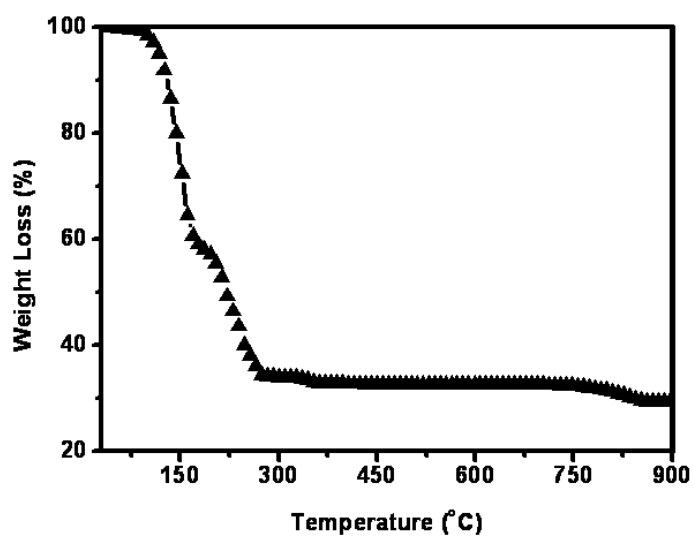

**Figure S1.** Thermogravimetry curves of  $\text{Cu}(\text{NO}_3)_2$  from 30 to 900 °C under flowing  $\text{N}_2$ .

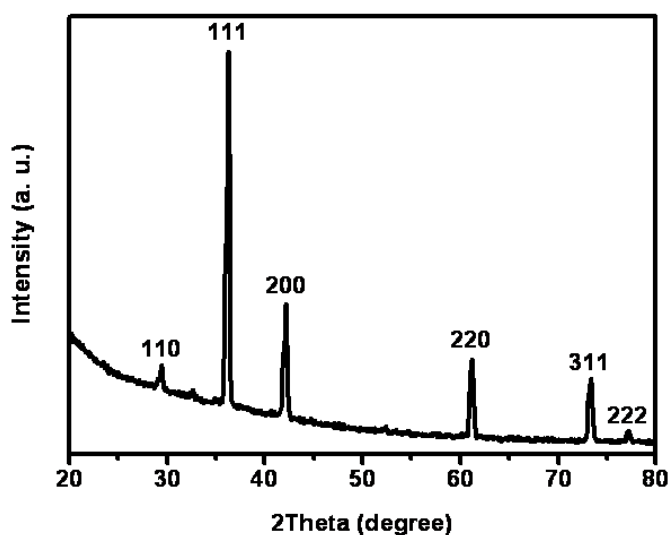

**Figure S2.** High-angle XRD diffraction pattern of the residual of  $\text{Cu}(\text{NO}_3)_2$  after TG measurement from 30 to 900 °C under flowing  $\text{N}_2$ .
